# Supplementary material
Source: PubMed Central journal article supplement (PMC7964444)
Supplement: 3913_table.pdf [file 3913_table.pdf]

**On-line Table: Aneurysm occlusion and hemodynamic data<sup>a</sup>**

| Case          | Occlusion (%) | <Q> (mL/s)         |                    | <v> (cm/s) |       | <τ> (dyne/cm <sup>2</sup> ) |       | <γ> (1/sec) |                    | MATT (s)             |
|---------------|---------------|--------------------|--------------------|------------|-------|-----------------------------|-------|-------------|--------------------|----------------------|
|               |               | Pre                | Post               | Pre        | Post  | Pre                         | Post  | Pre         | Post               |                      |
| 1             | 7%            | 3.75               | 2.29               | 2.00       | 0.96  | 1.78                        | 0.93  | 24.90       | 11.80              | 0.84                 |
| 2             | 19%           | 4.24               | 1.76               | 0.28       | 0.13  | 1.42                        | 0.81  | 20.00       | 9.86               | 2.58                 |
| 3             | 31%           | 2.83               | 0.37               | 1.44       | 0.20  | 1.16                        | 0.36  | 23.79       | 3.22               | 1.83                 |
| 4             | 41%           | 2.03               | 0.51               | 0.92       | 0.18  | 1.55                        | 0.42  | 19.79       | 3.85               | 1.39                 |
| [5]           | 46%           | 4.49               | 1.2                | 1.39       | 0.25  | 1.82                        | 0.42  | 24.09       | 4.43               | 2.23                 |
| [6]           | 73%           | 6.37               | 2.03               | 1.56       | 0.25  | 2.11                        | 0.51  | 26.20       | 5.65               | 2.30                 |
| 7             | 75%           | 3.75               | 2.29               | 2.81       | 0.49  | 3.50                        | 0.82  | 41.43       | 7.34               | 1.28                 |
| [8]           | 76%           | 4.24               | 1.76               | 1.94       | 0.26  | 2.48                        | 0.35  | 31.83       | 4.17               | 2.26                 |
| 9             | 77%           | 2.83               | 0.37               | 1.55       | 0.48  | 1.52                        | 0.74  | 20.53       | 6.87               | 0.25                 |
| [10]          | 82%           | 1.16               | 0.19               | 1.00       | 0.14  | 1.49                        | 0.38  | 19.16       | 2.92               | 3.95                 |
| 11            | 84%           | 2.31               | 0.54               | 1.37       | 0.22  | 1.69                        | 0.54  | 19.88       | 4.12               | 3.62                 |
| [12]          | 90%           | 0.45               | 0.2                | 1.02       | 0.12  | 1.51                        | 0.33  | 19.11       | 2.61               | 7.57                 |
| 13            | 91%           | 2.9                | 1.33               | 1.45       | 0.35  | 1.23                        | 0.38  | 16.96       | 4.36               | 2.72                 |
| 14            | 91%           | 1.77               | 0.57               | 0.94       | 0.20  | 1.16                        | 0.42  | 18.12       | 4.73               | 4.47                 |
| 15            | 94%           | 4.23               | 1.87               | 2.53       | 0.37  | 2.39                        | 0.64  | 33.82       | 6.73               | 2.36                 |
| 16            | 98%           | 0.7                | 0.11               | 1.01       | 0.14  | 1.59                        | 0.47  | 21.46       | 3.80               | 5.71                 |
| [17]          | 100%          | 0.11               | 0.02               | 1.49       | 0.48  | 1.60                        | 0.57  | 21.38       | 7.06               | 1.22                 |
| 18            | 100%          | 1.82               | 0.75               | 0.43       | 0.06  | 0.91                        | 0.28  | 13.44       | 2.31               | 5.01                 |
| 19            | 100%          | 0.37               | 0.06               | 0.20       | 0.04  | 0.44                        | 0.16  | 5.53        | 1.30               | 10.43                |
| 20            | 100%          | 0.55               | 0.37               | 1.45       | 0.56  | 2.06                        | 1.03  | 27.30       | 11.23              | 0.54                 |
| 21            | 100%          | 1.22               | 0.57               | 1.44       | 0.20  | 1.87                        | 0.37  | 24.02       | 3.44               | 3.24                 |
| 22            | 100%          | 0.39               | 0.11               | 0.46       | 0.08  | 1.07                        | 0.37  | 14.56       | 3.14               | 3.98                 |
| 23            | 100%          | 1.76               | 0.28               | 1.39       | 0.32  | 1.92                        | 0.66  | 23.58       | 5.50               | 1.26                 |
| Mean patent   |               | 3.95               | 1.36               | 1.50       | 0.41  | 1.82                        | 0.68  | 25.08       | 7.16               | 1.36                 |
| Mean occluded |               | 1.41               | 0.49               | 1.15       | 0.24  | 1.50                        | 0.48  | 19.89       | 4.52               | 4.01                 |
| Ratio         |               | 2.80               | 2.73               | 1.30       | 1.72  | 1.21                        | 1.21  | 1.26        | 1.58               | (2.94) <sup>-1</sup> |
| P value       |               | .0015 <sup>b</sup> | .0305 <sup>b</sup> | .3429      | .2074 | .6501                       | .1093 | .1528       | .0757 <sup>c</sup> | .0200 <sup>b</sup>   |
| AUC           |               | 0.67               | 0.54               | 0.51       | 0.51  | 0.43                        | 0.56  | 0.53        | 0.58               | 0.12                 |

**Note:**—MATT indicates mean aneurysm transit time; AUC, area under the curve.

<sup>a</sup> Cases between brackets were sacrificed before 1 week and were not included in the analysis.

<sup>b</sup> Statistically significant differences ( $P < .05$ ).

<sup>c</sup> Marginally significant differences ( $P < .10$ ).
